# Supplementary material
Source: Springer Nature journal article supplement (https://www.springermedizin.de/resource/supplementary/12894_2012_218_MOESM2_ESM.pdf/9513234)
Supplement: MOESM2 [file 9513234]

| SNP        | MAF   | normal acc. fibers * |                          | coiled axonemes * |       | normal 9+2 axoneme * |                          | normal fibrous sheath * |                          | % immaturity * |       | fertility index (FI) |       | <i>in situ</i> motility |       | motility 'a' |       | motility 'b'  |       |
|------------|-------|----------------------|--------------------------|-------------------|-------|----------------------|--------------------------|-------------------------|--------------------------|----------------|-------|----------------------|-------|-------------------------|-------|--------------|-------|---------------|-------|
|            |       | $\beta$ (SE)         | p                        | $\beta$ (SE)      | p     | $\beta$ (SE)         | p                        | $\beta$ (SE)            | p                        | $\beta$ (SE)   | p     | $\beta$ (SE)         | p     | $\beta$ (SE)            | p     | $\beta$ (SE) | p     | $\beta$ (SE)  | p     |
| rs2042791  | 0.408 | 0.03 (0.04)          | 0.499                    | 0.00 (0.04)       | 0.964 | 0.00 (0.06)          | 0.998                    | 0.01 (0.04)             | 0.879                    | -0.02 (0.03)   | 0.442 | 2.10 (12.56)         | 0.868 | -0.48 (0.83)            | 0.563 | -0.14 (0.50) | 0.785 | 0.30 (0.59)   | 0.615 |
| rs2042792  | 0.333 | 0.05 (0.04)          | 0.207                    | -0.01 (0.04)      | 0.774 | 0.04 (0.06)          | 0.479                    | 0.01 (0.04)             | 0.835                    | -0.01 (0.03)   | 0.829 | -16.83 (13.14)       | 0.209 | 0.05 (0.84)             | 0.955 | 0.00 (0.50)  | 0.994 | 0.25 (0.59)   | 0.673 |
| rs12623569 | 0.282 | 0.01 (0.04)          | 0.702                    | 0.02 (0.03)       | 0.601 | 0.00 (0.05)          | 0.978                    | 0.09 (0.04)             | <b>0.014<sup>c</sup></b> | 0.04 (0.03)    | 0.1   | 20.80 (10.72)        | 0.06  | 1.13 (0.74)             | 0.132 | 0.31 (0.45)  | 0.5   | -0.65 (0.53)  | 0.221 |
| rs16851495 | 0.142 | -0.12 (0.06)         | <b>0.041<sup>c</sup></b> | 0.01 (0.05)       | 0.873 | -0.16 (0.08)         | <b>0.039<sup>c</sup></b> | -0.03 (0.06)            | 0.674                    | -0.03 (0.04)   | 0.515 | -10.07 (16.19)       | 0.538 | -0.90 (1.18)            | 0.453 | -0.71 (0.70) | 0.32  | 0.10 (0.85)   | 0.905 |
| SNP        | MAF   | motility 'a+b'       |                          | total motility    |       | necrosis             |                          | % necrosis *            |                          | sperm/mL ^     |       | volume/mL            |       | total sperm             |       | apoptosis    |       | % apoptosis * |       |
|            |       | $\beta$ (SE)         | p                        | $\beta$ (SE)      | p     | $\beta$ (SE)         | p                        | $\beta$ (SE)            | p                        | $\beta$ (SE)   | p     | $\beta$ (SE)         | p     | $\beta$ (SE)            | p     | $\beta$ (SE) | p     | $\beta$ (SE)  | p     |
| rs2042791  | 0.408 | 0.16 (0.76)          | 0.831                    | -0.32 (1.25)      | 0.798 | -0.78 (5.1)          | 0.878                    | 0.00 (0.06)             | 0.991                    | -0.13 (0.34)   | 0.715 | -0.21 (0.47)         | 0.66  | 4.45 (20.26)            | 0.827 | -1.94 (2.28) | 0.399 | -0.04 (0.03)  | 0.292 |
| rs2042792  | 0.333 | 0.26 (0.76)          | 0.739                    | 0.30 (1.25)       | 0.81  | -6.21 (5.04)         | 0.224                    | -0.06 (0.06)            | 0.303                    | -0.55 (0.35)   | 0.128 | 0.04 (0.47)          | 0.939 | 18.60 (20.25)           | 0.363 | -1.75 (2.30) | 0.45  | -0.03 (0.03)  | 0.305 |
| rs12623569 | 0.282 | -0.35 (0.69)         | 0.616                    | 0.78 (1.13)       | 0.49  | -2.73 (4.60)         | 0.556                    | -0.04 (0.05)            | 0.471                    | 0.44 (0.32)    | 0.178 | -0.25 (0.42)         | 0.55  | 12.83 (18.33)           | 0.487 | -1.93 (2.07) | 0.356 | -0.03 (0.03)  | 0.361 |
| rs16851495 | 0.142 | -0.61 (1.08)         | 0.579                    | -1.50 (1.77)      | 0.401 | 11.55 (7.10)         | 0.11                     | 0.14 (0.08)             | 0.084                    | 0.46 (0.53)    | 0.382 | 0.24 (0.70)          | 0.723 | 17.74 (29.11)           | 0.107 | 1.68 (3.28)  | 0.611 | 0.02 (0.05)   | 0.637 |
